# Supplementary material for: What is the Priestley–Taylor wet-surface evaporation parameter? Testing four hypotheses
Source: Copernicus journal article supplement (doi:10.5194/hess-27-3205-2023), 2023-09-08
Supplement: Supplementary file 1 [file hess-27-3205-2023-supplement.pdf]

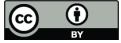

*Supplement of*

## **What is the Priestley–Taylor wet-surface evaporation parameter? Testing four hypotheses**

**Richard D. Crago et al.**

*Correspondence to:* Richard D. Crago ([rcrago@bucknell.edu](mailto:rcrago@bucknell.edu))

The copyright of individual parts of the supplement might differ from the article licence.

## S1. Supplemental Information

A list of all the sites, with FLUXNET site name, latitude, longitude, measurement height, canopy height, and IGBP land cover class is included in Table S1. Sites comprising six IGBP classes (CRO, GRA, ENF, OSH, DBF, and WET) were included. All information provided in Table S1 came from Wang et al. (2020).

5

Table S1. Sites and site information

|    | Site   | Lat     | Lon      | Measure_height (m) | Canopy_height (m) | IGBP_Class |
|----|--------|---------|----------|--------------------|-------------------|------------|
| 0  | AU-How | -12.494 | 131.152  | 23                 | 15                | WSA        |
| 1  | AU-Rig | -36.65  | 145.576  | 5                  | 0.4               | GRA        |
| 2  | AU-Stp | -17.151 | 133.35   | 4.2                | 0.2               | GRA        |
| 3  | AU-Tum | -35.657 | 148.152  | 70                 | 40                | EBF        |
| 4  | AU-Wac | -37.426 | 145.188  | 95                 | 70                | EBF        |
| 5  | AU-Whr | -36.673 | 145.029  | 35                 | 28                | EBF        |
| 6  | AU-Wom | -37.422 | 144.094  | 29                 | 25                | EBF        |
| 7  | AU-Ync | -34.989 | 146.291  | 20                 | 0.5               | GRA        |
| 8  | BE-Lon | 50.552  | 4.746    | 2.7                | 0.5               | CRO        |
| 9  | BR-Sa3 | -3.018  | -54.971  | 64                 | 27                | EBF        |
| 10 | CA-Qfo | 49.693  | -74.342  | 24                 | 13.8              | ENF        |
| 11 | CA-SF1 | 54.485  | -105.818 | 12                 | 6                 | ENF        |
| 12 | CA-SF2 | 54.254  | -105.878 | 10                 | 4                 | ENF        |
| 13 | AT-Neu | 47.117  | 11.318   | 2                  | 0.76              | GRA        |
| 14 | AU-ASM | -22.283 | 133.249  | 11.7               | 6.5               | ENF        |
| 15 | AU-Cpr | -34.002 | 140.589  | 20                 | 5                 | SAV        |
| 16 | AU-DaP | -14.063 | 131.318  | 18                 | 0.5               | GRA        |
| 17 | AU-DaS | -14.159 | 131.388  | 20.4               | 16.4              | SAV        |
| 18 | AU-Dry | -15.259 | 132.371  | 16.3               | 12.3              | SAV        |
| 19 | AU-Emr | -23.859 | 148.475  | 6.7                | 0.4               | GRA        |
| 20 | AU-Gin | -31.376 | 115.714  | 15                 | 6.8               | WSA        |
| 21 | CH-Cha | 47.21   | 8.41     | 2                  | 0.5               | GRA        |
| 22 | CH-Dav | 46.815  | 9.856    | 35                 | 18                | ENF        |
| 23 | CH-Fru | 47.116  | 8.538    | 2                  | 0.5               | GRA        |
| 24 | CN-Cng | 44.593  | 123.509  | 6                  | 0.5               | GRA        |
| 25 | DE-Geb | 51.1    | 10.914   | 6                  | 1                 | CRO        |
| 26 | DE-Gri | 50.95   | 13.513   | 3                  | 0.5               | GRA        |
| 27 | DE-Hai | 51.079  | 10.453   | 43.5               | 33                | DBF        |
| 28 | DE-Lkb | 49.1    | 13.305   | 9                  | 0.4               | ENF        |
| 29 | DE-Obe | 50.787  | 13.721   | 42                 | 13.5              | ENF        |
| 30 | DE-Seh | 50.871  | 6.45     | 2                  | 0.5               | CRO        |

|    |        |        |          |       |      |     |
|----|--------|--------|----------|-------|------|-----|
| 31 | DE-Tha | 50.962 | 13.565   | 42    | 30   | ENF |
| 32 | DK-Sor | 55.486 | 11.645   | 57    | 25   | DBF |
| 33 | FI-Hyy | 61.847 | 24.295   | 67.2  | 15   | ENF |
| 34 | FI-Jok | 60.899 | 23.513   | 3     | 0.2  | CRO |
| 35 | FI-Sod | 67.362 | 26.639   | 23    | 12.7 | ENF |
| 36 | FR-Gri | 48.844 | 1.952    | 2.8   | 2    | CRO |
| 37 | FR-LBr | 44.717 | -0.769   | 25    | 18   | ENF |
| 38 | IT-CA1 | 42.38  | 12.027   | 5     | 1    | DBF |
| 39 | IT-CA2 | 42.377 | 12.026   | 5     | 0.5  | CRO |
| 40 | IT-CA3 | 42.38  | 12.022   | 5     | 1    | DBF |
| 41 | IT-Col | 41.849 | 13.588   | 25.2  | 20.2 | DBF |
| 42 | IT-Cp2 | 41.704 | 12.357   | 15    | 12   | EBF |
| 43 | IT-Cpz | 41.705 | 12.376   | 15    | 12   | EBF |
| 44 | IT-Lav | 45.956 | 11.281   | 28    | 28   | ENF |
| 45 | IT-MBo | 46.015 | 11.046   | 2.5   | 0.3  | GRA |
| 46 | IT-Noe | 40.606 | 8.151    | 2     | 1.75 | CSH |
| 47 | IT-PT1 | 45.201 | 9.061    | 33    | 26.6 | DBF |
| 48 | IT-Ren | 46.587 | 11.434   | 41    | 31   | ENF |
| 49 | IT-SRo | 43.728 | 10.284   | 23.5  | 18   | ENF |
| 50 | IT-Tor | 45.844 | 7.578    | 2.5   | 0.5  | GRA |
| 51 | NL-Loo | 52.167 | 5.744    | 52    | 15.9 | ENF |
| 52 | RU-Ha1 | 54.725 | 90.002   | 2.5   | 0.5  | GRA |
| 53 | SD-Dem | 13.283 | 30.478   | 9     | 5    | SAV |
| 54 | US-AR1 | 36.427 | -99.42   | 4     | 1    | GRA |
| 55 | US-AR2 | 36.636 | -99.598  | 4     | 1    | GRA |
| 56 | US-ARM | 36.606 | -97.489  | 60    | 0.5  | CRO |
| 57 | US-Blo | 38.895 | -120.633 | 8.5   | 4    | ENF |
| 58 | US-GLE | 41.367 | -106.24  | 22.65 | 18   | ENF |
| 59 | US-KS2 | 28.609 | -80.672  | 4.1   | 2    | CSH |
| 60 | US-Me2 | 44.452 | -121.557 | 32    | 16   | ENF |
| 61 | US-MMS | 39.323 | -86.413  | 46    | 27   | DBF |
| 62 | US-Ne1 | 41.165 | -96.477  | 6.2   | 2    | CRO |
| 63 | US-Ne2 | 41.165 | -96.47   | 6.2   | 2    | CRO |
| 64 | US-Syv | 46.242 | -89.348  | 36    | 27   | MF  |
| 65 | US-Wi9 | 46.619 | -91.081  | 9     | 2.3  | ENF |
| 66 | US-Wi8 | 46.722 | -91.252  | 3     | 1.5  | DBF |
| 67 | US-Wi7 | 46.649 | -91.069  | 3     | 0.5  | OSH |
| 68 | US-Wi6 | 46.625 | -91.298  | 3     | 0.5  | OSH |
| 69 | US-Var | 38.413 | -120.951 | 2     | 0.3  | GRA |

|     |        |        |          |      |      |     |
|-----|--------|--------|----------|------|------|-----|
| 70  | US-Wi5 | 46.653 | -91.086  | 6    | 4    | ENF |
| 71  | US-Wi4 | 46.739 | -91.166  | 23   | 18   | ENF |
| 72  | US-Wi3 | 46.635 | -91.099  | 26   | 21   | DBF |
| 73  | US-WCr | 45.806 | -90.08   | 29.6 | 24   | DBF |
| 74  | US-Wi2 | 46.687 | -91.153  | 9    | 6    | ENF |
| 75  | US-Wi1 | 46.73  | -91.233  | 9    | 6    | DBF |
| 76  | US-UMd | 45.563 | -84.698  | 34   | 22   | DBF |
| 77  | US-Twt | 38.109 | -121.653 | 3.15 | 0.5  | CRO |
| 78  | US-UMB | 45.56  | -84.714  | 46   | 22   | DBF |
| 79  | US-Ton | 38.432 | -120.966 | 23   | 9.41 | WSA |
| 80  | US-Tw3 | 38.116 | -121.647 | 2.8  | 0.5  | CRO |
| 81  | US-Tw4 | 38.103 | -121.641 | 3.7  | 0.1  | WET |
| 82  | US-Tw2 | 38.105 | -121.643 | 5.15 | 2    | CRO |
| 83  | US-SRG | 31.789 | -110.828 | 8    | 2.5  | GRA |
| 84  | US-SRM | 31.821 | -110.866 | 6.4  | 2.5  | WSA |
| 85  | US-Tw1 | 38.107 | -121.647 | 4.64 | 0.1  | WET |
| 86  | US-SRC | 31.908 | -110.84  | 4.25 | 1.7  | MF  |
| 87  | US-Oho | 41.555 | -83.844  | 32   | 20   | DBF |
| 88  | US-Prr | 65.124 | -147.488 | 11   | 2.44 | ENF |
| 89  | US-Ne3 | 41.18  | -96.44   | 6.2  | 2    | CRO |
| 90  | US-ORv | 40.02  | -83.018  | 9.6  | 0.5  | WET |
| 91  | US-Myb | 38.05  | -121.765 | 4.6  | 0.5  | WET |
| 92  | US-Me6 | 44.323 | -121.608 | 12   | 5.2  | ENF |
| 93  | US-Me3 | 44.315 | -121.608 | 12   | 3.1  | ENF |
| 94  | US-Me5 | 44.437 | -121.567 | 20   | 4    | ENF |
| 95  | US-Me4 | 44.499 | -121.622 | 47   | 33   | ENF |
| 96  | US-LWW | 34.96  | -97.979  | 3    | 0.6  | GRA |
| 97  | US-Me1 | 44.579 | -121.5   | 47   | 33   | ENF |
| 98  | US-Ha1 | 42.538 | -72.172  | 30   | 26   | DBF |
| 99  | US-IB2 | 41.841 | -88.241  | 3.76 | 0.5  | GRA |
| 100 | US-lvo | 68.487 | -155.75  | 3    | 0.5  | WET |
| 101 | US-Goo | 34.255 | -89.874  | 4    | 0.3  | GRA |
| 102 | RU-Fyo | 56.462 | 32.922   | 42.8 | 34.8 | ENF |
| 103 | US-CRT | 41.628 | -83.347  | 2    | 1    | CRO |
| 104 | US-Atq | 70.47  | -157.409 | 2.5  | 0.5  | WET |
| 105 | US-GBT | 41.366 | -106.24  | 29   | 1    | ENF |
| 106 | US-ARc | 35.546 | -98.04   | 4    | 0.5  | GRA |
| 107 | SN-Dhr | 15.403 | -15.432  | 9    | 3    | SAV |
| 108 | RU-Cok | 70.829 | 147.494  | 4.7  | 0.3  | OSH |

|     |        |        |         |      |      |     |
|-----|--------|--------|---------|------|------|-----|
| 109 | US-ARb | 35.55  | -98.04  | 4    | 0.5  | GRA |
| 110 | NL-Hor | 52.24  | 5.071   | 4.3  | 0.5  | GRA |
| 111 | PA-SPs | 9.314  | -79.631 | 3    | 0.09 | GRA |
| 112 | PA-SPn | 9.318  | -79.635 | 15   | 10   | DBF |
| 113 | MY-PSO | 2.973  | 102.306 | 52   | 35   | EBF |
| 114 | IT-Ro2 | 42.39  | 11.921  | 18.6 | 17   | DBF |
| 115 | IT-Ro1 | 42.408 | 11.93   | 18.6 | 17   | DBF |
| 116 | IT-SR2 | 43.732 | 10.291  | 23.5 | 18   | ENF |
| 117 | IT-BCi | 40.524 | 14.957  | 3.8  | 0.3  | CRO |
| 118 | FR-Pue | 43.741 | 3.596   | 11   | 6    | EBF |
| 119 | IT-La2 | 45.954 | 11.285  | 33   | 30   | ENF |
| 120 | IT-Isp | 45.813 | 8.634   | 24   | 19   | DBF |
| 121 | GF-Guy | 5.279  | -52.925 | 52   | 32   | EBF |
| 122 | FR-Fon | 48.476 | 2.78    | 35   | 25   | DBF |
| 123 | GH-Ank | 5.269  | -2.694  | 65   | 30   | EBF |
| 124 | FI-Lom | 67.997 | 24.209  | 3    | 0.1  | WET |
| 125 | FI-Let | 60.642 | 23.96   | 2.75 | 0.1  | ENF |
| 126 | ES-Amo | 36.834 | -2.252  | 3.05 | 0.3  | OSH |
| 127 | ES-LgS | 37.098 | -2.966  | 2.25 | 0.2  | OSH |
| 128 | DK-Fou | 56.484 | 9.587   | 3.5  | 2    | CRO |
| 129 | DE-RuS | 50.866 | 6.447   | 2.2  | 2    | CRO |
| 130 | DE-Zrk | 53.876 | 12.889  | 2.63 | 0.1  | WET |
| 131 | DE-SfN | 47.806 | 11.328  | 6    | 2    | WET |
| 132 | DE-RuR | 50.622 | 6.304   | 2.6  | 0.1  | GRA |
| 133 | DE-Lnf | 51.328 | 10.368  | 44   | 34   | DBF |
| 134 | CZ-wet | 49.025 | 14.77   | 2.7  | 0.1  | WET |
| 135 | CZ-BK1 | 49.502 | 18.537  | 15   | 9.5  | ENF |
| 136 | CN-Qia | 26.741 | 115.058 | 39   | 12   | ENF |
| 137 | CN-Sw2 | 41.79  | 111.897 | 2    | 0.5  | GRA |
| 138 | CN-HaM | 37.37  | 101.18  | 2.5  | 0.2  | GRA |
| 139 | CN-Ha2 | 37.609 | 101.327 | 2.5  | 0.55 | WET |
| 140 | CN-Du3 | 42.055 | 116.281 | 4    | 0.2  | GRA |
| 141 | CN-Din | 23.173 | 112.536 | 27   | 20   | EBF |
| 142 | CN-Du2 | 42.047 | 116.284 | 4    | 0.45 | GRA |
| 143 | CH-Oe1 | 47.286 | 7.732   | 1.2  | 0.5  | GRA |
| 144 | CN-Dan | 30.498 | 91.066  | 2.2  | 0.1  | GRA |
| 145 | CN-Cha | 42.403 | 128.096 | 40   | 26   | MF  |
| 146 | CA-TP3 | 42.707 | -80.348 | 16   | 13.1 | ENF |
| 147 | CG-Tch | -4.289 | 11.656  | 3.8  | 1    | SAV |

|     |        |         |          |      |      |     |
|-----|--------|---------|----------|------|------|-----|
| 148 | CA-TP4 | 42.71   | -80.357  | 28   | 21.8 | ENF |
| 149 | CA-TPD | 42.635  | -80.558  | 35.7 | 25.7 | DBF |
| 150 | CA-Obs | 53.987  | -105.118 | 25   | 7.2  | ENF |
| 151 | CA-TP1 | 42.661  | -80.56   | 3    | 2.8  | ENF |
| 152 | CA-TP2 | 42.774  | -80.459  | 15   | 11.1 | ENF |
| 153 | CA-Oas | 53.629  | -106.198 | 39   | 22   | DBF |
| 154 | CA-NS6 | 55.917  | -98.964  | 8    | 4    | OSH |
| 155 | CA-NS5 | 55.863  | -98.485  | 9    | 2    | ENF |
| 156 | CA-NS7 | 56.636  | -99.948  | 4.25 | 0.25 | OSH |
| 157 | CA-NS4 | 55.914  | -98.381  | 10   | 7    | ENF |
| 158 | CA-Man | 55.88   | -98.481  | 30   | 10   | ENF |
| 159 | CA-NS3 | 55.912  | -98.382  | 10   | 7    | ENF |
| 160 | CA-NS2 | 55.906  | -98.525  | 20   | 16   | ENF |
| 161 | CA-NS1 | 55.879  | -98.484  | 24   | 18   | ENF |
| 162 | BE-Vie | 50.305  | 5.998    | 40   | 35.2 | MF  |
| 163 | CA-Gro | 48.217  | -82.156  | 43.3 | 30   | MF  |
| 164 | BE-Bra | 51.308  | 4.52     | 42   | 23   | MF  |
| 165 | BR-Sa1 | -2.857  | -54.959  | 57.8 | 41   | EBF |
| 166 | AU-Ade | -13.077 | 131.118  | 16.5 | 12.5 | WSA |
| 167 | AU-TTE | -22.287 | 133.64   | 10   | 4.85 | OSH |
| 168 | AU-Rob | -17.118 | 145.63   | 40   | 28   | EBF |
| 169 | AU-Fog | -12.545 | 131.307  | 5.5  | 1.5  | WET |
| 170 | AU-Cum | -33.615 | 150.724  | 29   | 24   | EBF |

## S2. Formulae from Andreas et al. (2013)

The formulae cited in section 2.1 coming from Andreas et al. (2013) are all functions of temperature (in degrees Celsius).

10 Saturation vapor pressure  $e^*$  (Pa) is given by:

$$e^*(T) = 6.1121 * 1.004 \exp[17.502T / (240.97 + T)], \quad \text{when } T > 0, \text{ and}$$

$$e^*(T) = 6.1115 * 1.004 \exp[22.452T / (272.55 + T)], \quad \text{when } T \leq 0.$$

The slope of the saturate vapor pressure curve  $\Delta$  (Pa/K) is given by:

15  $\Delta(T) = e^*(T) [17.502 * 240.97 / (240.97 + T)]^2$ , where  $T > 0$ , and

$$\Delta(T) = e^*(T) [22.452 * 272.55 / (272.55 + T)]^2, \quad \text{where } T \leq 0.$$

The latent heat of evaporation  $l_v$  (J/kg) is given by:

$$l_v = (25 - 0.02274T) 100000, \quad \text{when } T > 0 \text{ and}$$

20  $l_v = (28.34 - 0.00149T) 100000$ , when  $T \leq 0$ .

**Table S2 Findings with  $z_0$  Determined From Friction Velocity Measurements for Monthly Data**

| Method     | Optimized variable | Parameter value | RMS error        | R    | S    | I                | NSE  |
|------------|--------------------|-----------------|------------------|------|------|------------------|------|
| $\alpha_c$ | $\alpha$           | 1.70            | 0.94             | 0    | 0    | 1.70             | 0    |
| $\alpha_A$ | $\alpha$           | 0.06            | 0.39             | 0.92 | 0.83 | 0.44             | 0.78 |
| <i>RH</i>  | $\alpha$           | 0.69            | 0.43             | 0.90 | 0.79 | 0.46             | 0.73 |
| <i>m</i>   | $\alpha$           | 0.69            | 0.33             | 0.94 | 0.88 | 0.20             | 0.86 |
|            |                    |                 | W/m <sup>2</sup> |      |      | W/m <sup>2</sup> |      |
| $\alpha_c$ | $LE_w$             | 1.35            | 10.28            | 0.98 | 1.08 | -9.45            | 0.96 |
| $\alpha_A$ | $LE_w$             | 0.23            | 7.23             | 0.99 | 1.01 | -1.19            | 0.98 |
| <i>RH</i>  | $LE_w$             | 0.78            | 9.77             | 0.98 | 0.95 | 4.24             | 0.95 |
| <i>m</i>   | $LE_w$             | 0.66            | 7.09             | 0.99 | 0.98 | 1.29             | 0.98 |
|            |                    |                 | W/m <sup>2</sup> |      |      | W/m <sup>2</sup> |      |
| $\alpha_c$ | $LE$               | 1.22            | 19.09            | 0.89 | 0.84 | 8.37             | 0.75 |
| $\alpha_A$ | $LE$               | 0.6             | 19.35            | 0.89 | 0.75 | 10.09            | 0.68 |
| <i>RH</i>  | $LE$               | 0.95            | 20.37            | 0.87 | 0.74 | 14.95            | 0.65 |
| <i>m</i>   | $LE$               | 0.46            | 18.27            | 0.89 | 0.79 | 13.42            | 0.74 |

**Table S3. Findings with  $z_0$  Determined From Friction Velocity Measurements for Daily Data**

| Method     | Optimized variable | Parameter value | RMS error        | R    | S    | I                | NSE  |
|------------|--------------------|-----------------|------------------|------|------|------------------|------|
| $\alpha_c$ | $\alpha$           | 1.64            | 1.03             | 0    | 0    | 1.64             | 0    |
| $\alpha_A$ | $\alpha$           | 0.04            | 0.54             | 0.88 | 0.79 | 0.58             | 0.66 |
| <i>RH</i>  | $\alpha$           | 0               | 0.79             | 0.74 | .71  | 0.78             | 0.36 |
| <i>m</i>   | $\alpha$           | 0.63            | 0.41             | 0.92 | 0.84 | 0.27             | 0.81 |
|            |                    |                 | W/m <sup>2</sup> |      |      | W/m <sup>2</sup> |      |
| $\alpha_c$ | $LE_w$             | 1.34            | 11.92            | 0.98 | 1.04 | -6.23            | 0.95 |
| $\alpha_A$ | $LE_w$             | 0.26            | 8.41             | 0.99 | 0.99 | 0.12             | 0.97 |
| <i>RH</i>  | $LE_w$             | 0.77            | 12.38            | 0.97 | 0.94 | 6.69             | 0.94 |
| <i>m</i>   | $LE_w$             | 0.61            | 8.28             | 0.99 | 0.97 | 2.12             | 0.97 |
|            |                    |                 | W/m <sup>2</sup> |      |      | W/m <sup>2</sup> |      |
| $\alpha_c$ | $LE$               | 1.18            | 24.74            | 0.86 | 0.77 | 13.7             | 0.67 |
| $\alpha_A$ | $LE$               | 0.6             | 24.63            | 0.86 | 0.72 | 15.2             | 0.62 |
| <i>RH</i>  | $LE$               | 0.96            | 26.39            | 0.84 | 0.67 | 18.28            | 0.53 |
| <i>m</i>   | $LE$               | 0.36            | 24.57            | 0.86 | 0.72 | 17.24            | 0.63 |
